# Supplementary material for: Interlaboratory comparison for the Filovirus Animal Nonclinical Group (FANG) anti-Ebola virus glycoprotein immunoglobulin G enzyme-linked immunosorbent assay
Source: PLoS One. 2020 Aug 25;15(8):e0238196. doi: 10.1371/journal.pone.0238196 (PMC7447032; doi:10.1371/journal.pone.0238196)
Supplement: S5 Table — (XLSX) [file pone.0238196.s014.xlsx]

## Sheet: Lab D
S5 Table. ELISA concentrations of each test sample - Laboratory D.
Plate Name	Performance Date	Sample Name	Sample Pass/Fail	Operator	Plate Pass/Fail	Anti-GP IgG (ELISA Units/mL)
418170201	04/18/2017	11	PASS	2	Pass	544.87
418170201	04/18/2017	12	PASS	2	Pass	326.57
418170201	04/18/2017	12	PASS	2	Pass	336.73
418170201	04/18/2017	12	PASS	2	Pass	336.24
418170201	04/18/2017	13	PASS	2	Pass	257.28
418170201	04/18/2017	15	PASS	2	Pass	648.92
418170201	04/18/2017	17	PASS	2	Pass	153.57
418170201	04/18/2017	18	PASS	2	Pass	0
418170201	04/18/2017	19	PASS	2	Pass	104.47
418170201	04/18/2017	20	PASS	2	Pass	49.84
418170202	04/18/2017	11	PASS	2	Pass	439.04
418170202	04/18/2017	13	PASS	2	Pass	223.17
418170202	04/18/2017	14	PASS	2	Pass	519.41
418170202	04/18/2017	14	PASS	2	Pass	525.8
418170202	04/18/2017	14	PASS	2	Pass	549.17
418170202	04/18/2017	15	PASS	2	Pass	566.03
418170202	04/18/2017	16	PASS	2	Pass	333.92
418170202	04/18/2017	17	PASS	2	Pass	153.79
418170202	04/18/2017	19	PASS	2	Pass	95.31
418170202	04/18/2017	20	PASS	2	Pass	43.18
418170203	04/18/2017	11	PASS	2	Fail	546.88
418170203	04/18/2017	13	PASS	2	Fail	256.54
418170203	04/18/2017	14	PASS	2	Fail	540.15
418170203	04/18/2017	15	PASS	2	Fail	539.6
418170203	04/18/2017	16	PASS	2	Fail	339.74
418170203	04/18/2017	16	PASS	2	Fail	329.15
418170203	04/18/2017	16	PASS	2	Fail	325.27
418170203	04/18/2017	17	PASS	2	Fail	131.67
418170203	04/18/2017	18	PASS	2	Fail	0
418170203	04/18/2017	19	PASS	2	Fail	73.94
418170204	04/18/2017	11	PASS	2	Fail	543.76
418170204	04/18/2017	12	PASS	2	Fail	352.49
418170204	04/18/2017	13	PASS	2	Fail	258.03
418170204	04/18/2017	15	PASS	2	Fail	578.78
418170204	04/18/2017	16	PASS	2	Fail	340.68
418170204	04/18/2017	17	PASS	2	Fail	145.18
418170204	04/18/2017	18	PASS	2	Fail	0
418170204	04/18/2017	18	PASS	2	Fail	0
418170204	04/18/2017	18	PASS	2	Fail	0
418170204	04/18/2017	19	PASS	2	Fail	82.7
418170205	04/18/2017	11	PASS	2	Fail	590.99
418170205	04/18/2017	12	PASS	2	Fail	359.31
418170205	04/18/2017	13	PASS	2	Fail	259.97
418170205	04/18/2017	14	PASS	2	Fail	506.4
418170205	04/18/2017	15	FAIL	2	Fail	581.27
418170205	04/18/2017	17	PASS	2	Fail	144.17
418170205	04/18/2017	19	PASS	2	Fail	93.11
418170205	04/18/2017	20	PASS	2	Fail	40.73
418170205	04/18/2017	20	PASS	2	Fail	0
418170205	04/18/2017	20	PASS	2	Fail	37.25
418170206	04/18/2017	11	PASS	2	Pass	604.21
418170206	04/18/2017	12	PASS	2	Pass	371.92
418170206	04/18/2017	13	PASS	2	Pass	281.79
418170206	04/18/2017	14	PASS	2	Pass	673.52
418170206	04/18/2017	15	PASS	2	Pass	753.31
418170206	04/18/2017	16	PASS	2	Pass	445.03
418170206	04/18/2017	17	PASS	2	Pass	171.11
418170206	04/18/2017	18	PASS	2	Pass	0
418170206	04/18/2017	19	PASS	2	Pass	109.17
418170206	04/18/2017	20	PASS	2	Pass	53.07
419170201	04/19/2017	11	PASS	2	Pass	644.53
419170201	04/19/2017	11	PASS	2	Pass	580.11
419170201	04/19/2017	11	PASS	2	Pass	544.51
419170201	04/19/2017	12	PASS	2	Pass	352.07
419170201	04/19/2017	14	PASS	2	Pass	653.7
419170201	04/19/2017	16	PASS	2	Pass	429.43
419170201	04/19/2017	17	PASS	2	Pass	176.55
419170201	04/19/2017	18	PASS	2	Pass	0
419170201	04/19/2017	19	PASS	2	Pass	112.71
419170201	04/19/2017	20	PASS	2	Pass	54.85
419170202	04/19/2017	11	PASS	2	Pass	645.24
419170202	04/19/2017	12	PASS	2	Pass	362.41
419170202	04/19/2017	13	PASS	2	Pass	232.7
419170202	04/19/2017	13	PASS	2	Pass	227.27
419170202	04/19/2017	13	PASS	2	Pass	246.46
419170202	04/19/2017	14	PASS	2	Pass	580.56
419170202	04/19/2017	15	PASS	2	Pass	671.1
419170202	04/19/2017	16	PASS	2	Pass	442.22
419170202	04/19/2017	18	PASS	2	Pass	0
419170202	04/19/2017	20	PASS	2	Pass	52.93
419170203	04/19/2017	12	PASS	2	Pass	382.86
419170203	04/19/2017	14	PASS	2	Pass	616.87
419170203	04/19/2017	15	PASS	2	Pass	675.26
419170203	04/19/2017	15	FAIL	2	Pass	445.86
419170203	04/19/2017	15	FAIL	2	Pass	593.86
419170203	04/19/2017	16	PASS	2	Pass	382.47
419170203	04/19/2017	17	PASS	2	Pass	146.85
419170203	04/19/2017	18	PASS	2	Pass	0
419170203	04/19/2017	19	PASS	2	Pass	94.44
419170203	04/19/2017	20	PASS	2	Pass	56.45
419170204	04/19/2017	11	PASS	2	Pass	593.8
419170204	04/19/2017	12	PASS	2	Pass	334.81
419170204	04/19/2017	13	PASS	2	Pass	242.85
419170204	04/19/2017	14	FAIL	2	Pass	499.04
419170204	04/19/2017	16	PASS	2	Pass	412.04
419170204	04/19/2017	17	PASS	2	Pass	146.28
419170204	04/19/2017	17	PASS	2	Pass	148.7
419170204	04/19/2017	17	PASS	2	Pass	152.1
419170204	04/19/2017	18	PASS	2	Pass	0
419170204	04/19/2017	20	PASS	2	Pass	51.21
419170205	04/19/2017	12	PASS	2	Pass	473.01
419170205	04/19/2017	13	PASS	2	Pass	334.23
419170205	04/19/2017	14	PASS	2	Pass	753.15
419170205	04/19/2017	15	PASS	2	Pass	802.07
419170205	04/19/2017	16	PASS	2	Pass	466.84
419170205	04/19/2017	18	PASS	2	Pass	0
419170205	04/19/2017	19	PASS	2	Pass	124.66
419170205	04/19/2017	19	PASS	2	Pass	129.19
419170205	04/19/2017	19	PASS	2	Pass	125.63
419170205	04/19/2017	20	PASS	2	Pass	63.83
419170206	04/19/2017	11	PASS	2	Pass	693.02
419170206	04/19/2017	12	PASS	2	Pass	424.84
419170206	04/19/2017	13	PASS	2	Pass	334.45
419170206	04/19/2017	14	PASS	2	Pass	758.87
419170206	04/19/2017	15	PASS	2	Pass	862.73
419170206	04/19/2017	16	PASS	2	Pass	508.26
419170206	04/19/2017	17	PASS	2	Pass	197.64
419170206	04/19/2017	18	PASS	2	Pass	0
419170206	04/19/2017	19	PASS	2	Pass	126.31
419170206	04/19/2017	20	PASS	2	Pass	62.22
424170201	04/24/2017	11	PASS	2	Pass	585.82
424170201	04/24/2017	13	PASS	2	Pass	275.25
424170201	04/24/2017	14	PASS	2	Pass	588.24
424170201	04/24/2017	15	PASS	2	Pass	636.07
424170201	04/24/2017	16	PASS	2	Pass	401.55
424170201	04/24/2017	16	PASS	2	Pass	386
424170201	04/24/2017	16	PASS	2	Pass	383.88
424170201	04/24/2017	17	PASS	2	Pass	149.67
424170201	04/24/2017	18	PASS	2	Pass	0
424170201	04/24/2017	19	PASS	2	Pass	87.59
424170202	04/24/2017	11	PASS	2	Pass	622.3
424170202	04/24/2017	12	PASS	2	Pass	378.29
424170202	04/24/2017	13	PASS	2	Pass	277.1
424170202	04/24/2017	15	PASS	2	Pass	658.86
424170202	04/24/2017	16	PASS	2	Pass	430.76
424170202	04/24/2017	17	PASS	2	Pass	161.89
424170202	04/24/2017	18	PASS	2	Pass	0
424170202	04/24/2017	18	PASS	2	Pass	0
424170202	04/24/2017	18	PASS	2	Pass	0
424170202	04/24/2017	19	PASS	2	Pass	90.26
424170203	04/24/2017	11	PASS	2	Pass	638.48
424170203	04/24/2017	12	PASS	2	Pass	385.66
424170203	04/24/2017	13	PASS	2	Pass	272.88
424170203	04/24/2017	14	PASS	2	Pass	566.56
424170203	04/24/2017	15	PASS	2	Pass	624.9
424170203	04/24/2017	17	PASS	2	Pass	157.12
424170203	04/24/2017	19	PASS	2	Pass	102.22
424170203	04/24/2017	20	PASS	2	Pass	47.01
424170203	04/24/2017	20	PASS	2	Pass	40.87
424170203	04/24/2017	20	PASS	2	Pass	42.68
424170204	04/24/2017	15	PASS	2	Pass	854.28
424170204	04/24/2017	15	PASS	2	Pass	795.87
424170204	04/24/2017	14	PASS	2	Pass	685.12
426170204	04/26/2017	11	PASS	2	Pass	640.4
426170204	04/26/2017	14	PASS	2	Pass	780.32
426170204	04/26/2017	14	PASS	2	Pass	786.84
426170204	04/26/2017	14	PASS	2	Pass	759.4
426170204	04/26/2017	15	PASS	2	Pass	874.88
426170204	04/26/2017	15	PASS	2	Pass	844.24
426170204	04/26/2017	15	PASS	2	Pass	882.52
426170204	04/26/2017	15	PASS	2	Pass	838.76
426170204	04/26/2017	15	PASS	2	Pass	940.32
418170501	04/18/2017	11	PASS	5	Pass	610.49
418170501	04/18/2017	11	PASS	5	Pass	539.35
418170501	04/18/2017	11	PASS	5	Pass	579.51
418170501	04/18/2017	12	PASS	5	Pass	318.25
418170501	04/18/2017	14	PASS	5	Pass	661.22
418170501	04/18/2017	16	PASS	5	Pass	436.44
418170501	04/18/2017	17	PASS	5	Pass	167.59
418170501	04/18/2017	18	PASS	5	Pass	0
418170501	04/18/2017	19	PASS	5	Pass	112.26
418170501	04/18/2017	20	PASS	5	Pass	56.08
418170502	04/18/2017	11	PASS	5	Pass	536.22
418170502	04/18/2017	12	PASS	5	Pass	311.87
418170502	04/18/2017	13	PASS	5	Pass	225.37
418170502	04/18/2017	13	PASS	5	Pass	191.92
418170502	04/18/2017	13	PASS	5	Pass	223.58
418170502	04/18/2017	14	PASS	5	Pass	547.06
418170502	04/18/2017	15	PASS	5	Pass	638.41
418170502	04/18/2017	16	PASS	5	Pass	385.81
418170502	04/18/2017	18	PASS	5	Pass	0
418170502	04/18/2017	20	FAIL	5	Pass	36.74
418170503	04/18/2017	12	PASS	5	Pass	348.06
418170503	04/18/2017	14	PASS	5	Pass	567.58
418170503	04/18/2017	15	PASS	5	Pass	639.5
418170503	04/18/2017	15	FAIL	5	Pass	521.23
418170503	04/18/2017	15	PASS	5	Pass	618.81
418170503	04/18/2017	16	PASS	5	Pass	368.78
418170503	04/18/2017	17	PASS	5	Pass	143.51
418170503	04/18/2017	18	PASS	5	Pass	0
418170503	04/18/2017	19	PASS	5	Pass	95.39
418170503	04/18/2017	20	FAIL	5	Pass	39.27
418170504	04/18/2017	11	PASS	5	Pass	595.98
418170504	04/18/2017	12	PASS	5	Pass	328.16
418170504	04/18/2017	13	PASS	5	Pass	239.3
418170504	04/18/2017	14	FAIL	5	Pass	476.54
418170504	04/18/2017	16	PASS	5	Pass	396.63
418170504	04/18/2017	17	PASS	5	Pass	150.39
418170504	04/18/2017	17	PASS	5	Pass	157.64
418170504	04/18/2017	17	PASS	5	Pass	154.53
418170504	04/18/2017	18	PASS	5	Pass	0
418170504	04/18/2017	20	FAIL	5	Pass	43.57
418170505	04/18/2017	12	PASS	5	Pass	395.64
418170505	04/18/2017	13	PASS	5	Pass	258.97
418170505	04/18/2017	14	PASS	5	Pass	636.24
418170505	04/18/2017	15	FAIL	5	Pass	585.66
418170505	04/18/2017	16	PASS	5	Pass	432.4
418170505	04/18/2017	18	PASS	5	Pass	0
418170505	04/18/2017	19	PASS	5	Pass	104.7
418170505	04/18/2017	19	PASS	5	Pass	107.58
418170505	04/18/2017	19	PASS	5	Pass	106.53
418170505	04/18/2017	20	PASS	5	Pass	47.26
418170506	04/18/2017	11	PASS	5	Pass	622.09
418170506	04/18/2017	12	PASS	5	Pass	370.01
418170506	04/18/2017	13	PASS	5	Pass	279.48
418170506	04/18/2017	14	PASS	5	Pass	574.78
418170506	04/18/2017	15	PASS	5	Pass	772.64
418170506	04/18/2017	16	PASS	5	Pass	459.16
418170506	04/18/2017	17	PASS	5	Pass	175.91
418170506	04/18/2017	18	PASS	5	Pass	0
418170506	04/18/2017	19	PASS	5	Pass	112.48
418170506	04/18/2017	20	PASS	5	Pass	57.57
419170501	04/19/2017	11	PASS	5	Pass	597.22
419170501	04/19/2017	12	PASS	5	Pass	354.77
419170501	04/19/2017	12	PASS	5	Pass	344.03
419170501	04/19/2017	12	PASS	5	Pass	306.23
419170501	04/19/2017	13	PASS	5	Pass	268.23
419170501	04/19/2017	15	PASS	5	Pass	772.92
419170501	04/19/2017	17	PASS	5	Pass	175.73
419170501	04/19/2017	18	PASS	5	Pass	0
419170501	04/19/2017	19	PASS	5	Pass	122.5
419170501	04/19/2017	20	PASS	5	Pass	60.74
419170502	04/19/2017	11	PASS	5	Pass	554.19
419170502	04/19/2017	13	PASS	5	Pass	237.15
419170502	04/19/2017	14	PASS	5	Pass	566.5
419170502	04/19/2017	14	FAIL	5	Pass	494.55
419170502	04/19/2017	14	PASS	5	Pass	576.12
419170502	04/19/2017	15	PASS	5	Pass	670.06
419170502	04/19/2017	16	PASS	5	Pass	396.17
419170502	04/19/2017	17	PASS	5	Pass	160.51
419170502	04/19/2017	19	PASS	5	Pass	98.75
419170502	04/19/2017	20	PASS	5	Pass	54.45
419170503	04/19/2017	11	PASS	5	Fail	501.78
419170503	04/19/2017	13	PASS	5	Fail	228.88
419170503	04/19/2017	14	PASS	5	Fail	593.17
419170503	04/19/2017	15	PASS	5	Fail	660.61
419170503	04/19/2017	16	PASS	5	Fail	383.48
419170503	04/19/2017	16	PASS	5	Fail	394.05
419170503	04/19/2017	16	PASS	5	Fail	390.32
419170503	04/19/2017	17	PASS	5	Fail	159.27
419170503	04/19/2017	18	PASS	5	Fail	0
419170503	04/19/2017	19	PASS	5	Fail	114.49
4190504	04/19/2017	11	PASS	5	Pass	544.68
4190504	04/19/2017	12	PASS	5	Pass	323.66
4190504	04/19/2017	13	PASS	5	Pass	236.71
4190504	04/19/2017	15	FAIL	5	Pass	568.6
4190504	04/19/2017	16	PASS	5	Pass	385.41
4190504	04/19/2017	17	PASS	5	Pass	150.8
4190504	04/19/2017	18	PASS	5	Pass	0
4190504	04/19/2017	18	PASS	5	Pass	0
4190504	04/19/2017	18	PASS	5	Pass	0
4190504	04/19/2017	19	PASS	5	Pass	109.88
419170505	04/19/2017	11	PASS	5	Pass	552.32
419170505	04/19/2017	12	PASS	5	Pass	315.44
419170505	04/19/2017	13	PASS	5	Pass	240.07
419170505	04/19/2017	14	PASS	5	Pass	546.77
419170505	04/19/2017	15	PASS	5	Pass	713.61
419170505	04/19/2017	17	PASS	5	Pass	163
419170505	04/19/2017	19	PASS	5	Pass	101.61
419170505	04/19/2017	20	PASS	5	Pass	50.91
419170505	04/19/2017	20	PASS	5	Pass	45.31
419170505	04/19/2017	20	PASS	5	Pass	55.25
419170206	04/19/2017	11	PASS	5	Pass	579.08
419170206	04/19/2017	12	PASS	5	Pass	350.69
419170206	04/19/2017	13	PASS	5	Pass	263.79
419170206	04/19/2017	14	PASS	5	Pass	579.83
419170206	04/19/2017	15	PASS	5	Pass	742.79
419170206	04/19/2017	16	PASS	5	Pass	440.9
419170206	04/19/2017	17	PASS	5	Pass	171.25
419170206	04/19/2017	18	PASS	5	Pass	0
419170206	04/19/2017	19	PASS	5	Pass	111.44
419170206	04/19/2017	20	PASS	5	Pass	57.08
424170501	04/24/2017	11	PASS	5	Pass	837.9
424170501	04/24/2017	13	PASS	5	Pass	358.65
424170501	04/24/2017	14	PASS	5	Pass	821.35
424170501	04/24/2017	15	PASS	5	Pass	863.08
424170501	04/24/2017	16	PASS	5	Pass	562.22
424170501	04/24/2017	16	PASS	5	Pass	531.14
424170501	04/24/2017	16	PASS	5	Pass	493.05
424170501	04/24/2017	17	PASS	5	Pass	207.08
424170501	04/24/2017	18	PASS	5	Pass	0
424170501	04/24/2017	19	PASS	5	Pass	110.88
424170502	04/24/2017	14	FAIL	5	Pass	860.82
424170502	04/24/2017	15	PASS	5	Pass	998.72
424170502	04/24/2017	20	PASS	5	Pass	89.2
424170502	04/24/2017	14	FAIL	5	Pass	823.02
424170502	04/24/2017	15	FAIL	5	Pass	872.67
424170502	04/24/2017	20	PASS	5	Pass	75.59
424170502	04/24/2017	15	FAIL	5	Pass	849.73
424170502	04/24/2017	20	PASS	5	Pass	67.8
427170501	04/27/2017	14	PASS	5	Pass	907.03
427170501	04/27/2017	14	PASS	5	Pass	841.34
427170501	04/27/2017	15	PASS	5	Pass	990.46
427170501	04/27/2017	15	PASS	5	Pass	979.92
427170502	04/27/2017	15	PASS	5	Pass	1108.64
427170502	04/27/2017	15	PASS	5	Pass	1022.2
427170502	04/27/2017	15	PASS	5	Pass	1018.76
427170502	04/27/2017	15	PASS	5	Pass	973.48
427170502	04/27/2017	15	PASS	5	Pass	930.92
427170502	04/27/2017	15	PASS	5	Pass	965.4
